# Supplementary material for: Animal-Borne Imaging Reveals Novel Insights into the Foraging Behaviors and Diel Activity of a Large-Bodied Apex Predator, the American Alligator (Alligator mississippiensis)
Source: PLoS One. 2014 Jan 15;9(1):e83953. doi: 10.1371/journal.pone.0083953 (PMC3893291; doi:10.1371/journal.pone.0083953)
Supplement: Table S1 — Crittercam deployment data. Summary of all data from each individual American alligator outfitted with a Crittercam unit. (XLSX) [file pone.0083953.s001.xlsx]

## Sheet: Sheet1
Individual	Location	LAT	LONG	Capture date	Capture Time	Capture site salinity (ppt)	Total Length (cm)	Snout-to-vent Length (cm)	Sex	Detachment date	Recording Days	Recording window	Recording Interval	Early Detachment	Video Recorded (hours)	Usable Video (hours)	Number Prey Attacks	Number of Prey Captures	Time Foraging (hours)	Time On land (hours)	Time Sitting Surface (hours)	Time Sitting Submerged (hours)	Time Swimming Surface (hours)	Time Swimming Submerged (hours)	Morning Recordings (hours)	Day Recordings (hours)	Evening Recordings (hours)	Night Recordings (hours)
GTM124	Guana Lake	30.1422	-81.3572	2011-04-27	2045	13	266.5	139.5	MALE	2011-04-28	1	0200-1000	hour	NO	4.76444	4.7645	25	14	0.155	0.1675	2.52694	0.444444	1.29944	0.171111	2.79111	0	0	1.97333
GTM123	Guana Lake	30.0907	-81.3476	2011-04-30	2050	36	221	112.5	FEMALE	2011-05-03	2	0700-1500	30 minute	NO	3.72889	3.72983	1	0	0.0263889	0	1.33444	1.23361	0.645556	0.488889	1.49083	2.23806	0	0
GTM140	Guana Lake	30.0854	-81.3465	2011-04-30	2130	36	304	179.5	MALE	2011-05-03	2	1200-2000	30 minute	NO	6.58917	0	0	0	N/A	N/A	N/A	N/A	N/A	N/A	N/A	N/A	N/A	N/A
GTM132	Guana Lake	30.1078	-81.3491	2011-05-04	2030	32	252	134.3	MALE	2011-05-05	1	0200-1000	hour	NO	3.18	3.17967	4	2	0.0252778	0	0.471389	1.00389	0.780833	0.898611	1.20417	0	0	1.97583
GTM133	Guana Lake	30.0621	-81.3406	2011-05-06	2030	40	256.5	135.3	FEMALE	2011-05-07	1	0600-1400	hour	NO	6.93306	3.7995	0	0	0	3.89083	2.39194	0.49	0.00555556	0.0213889	3.86944	2.93028	0	0
GTM144	Guana Lake	30.1178	-81.3526	2011-05-06	2158	33	227.1	112.5	FEMALE	2011-05-07	1	2200-0600	hour	NO	4.54583	3.54617	0	0	0	0	0.0536111	4.36889	0.0827778	0.0405556	0	0	0.101389	4.44444
NASA5562	MINWR	28.5092	-80.6444	2010-04-22	930	0	286	146	MALE	2010-04-23	1	1800-2200/0200-0600	hour	NO	8.025	8.02483	7	6	0.0308333	0	3.91389	3.16861	0.496944	0.414722	2.44639	0.971667	3.03694	1.57
NASA5569	MINWR	28.5908	-80.6272	2010-04-23	1350	22	262	148	MALE	2010-04-25	2	1600-2400	30 minute	YES	7.93167	4.9845	2	0	0.0122222	0.175556	4.45972	0.116667	0.135833	0.0841667	0	2.49444	1.9925	0.497222
NASA5583	MINWR	28.5111	-80.6073	2010-04-26	1250	26	258	131	MALE	2010-04-28	2	1400-2200	30 minute	YES	7.99139	7.992	9	2	0.177222	0.03	4.34639	1.51417	0.614444	1.30917	0	4.98944	3.00194	0
NASA5236R	MINWR	28.5935	-80.6651	2010-04-26	1105	1	269	154	MALE	2010-04-28	2	0200-1000	30 minute	NO	7.93056	7.93033	8	5	0.0530556	0	4.77139	2.32778	0.583056	0.195278	5.94889	0	0	1.98167
NASA5425R	MINWR	28.5572	-80.5921	2010-04-29	1145	26	224	144	MALE	2010-04-30	1	1400-2200	hour	NO	8	3.99967	0	0	0	0	0	5.06944	2.88	0.0505556	0	4.85111	3.14889	0
NASA5578	MINWR	28.5516	-80.6065	2010-04-29	1047	26	307	160	MALE	2010-04-30	1	1400-2200	hour	YES	7.98944	2.00033	0	0	0	0.441389	0.553056	0.055	1.95083	0	0	3.00028	0	0
NASA5581	MINWR	28.5572	-80.5921	2010-05-01	930	26	261.5	142	FEMALE	2010-05-03	2	1400-2200	30 minute	YES	8.455	0.497833	0	0	0	0	0.371944	0	0.0972222	0.0286111	0	0.497778	0	0
NASA5306R	MINWR	28.503	-80.5892	2010-05-01	1432	18	269.2	156.4	MALE	2010-05-05	2	1800-0200	30 minute	NO	7.95306	7.953	2	1	0.0166667	0	5.52028	2.2975	0.0211111	0.0975	0	0.995	3.97694	2.98111
NASA5588	MINWR	28.5899	-80.6582	2010-05-04	1225	N/A	270	148	MALE	2010-05-06	2	1400-2200	30 minute	NO	7.965	7.96517	1	1	0.00194444	0	0.439444	6.93944	0.171389	0.412778	0	4.97667	2.98833	0
